# Supplementary material for: Supramolecular gel assisted synthesis of Co2P nanosheets as an efficient and stable catalyst for oxygen reduction reaction
Source: Royal Society of Chemistry journal article supplement (doi:10.1039/c8nj01281d), 2018-01-01
Supplement: c8nj01281d1.pdf [file c8nj01281d1.pdf]

## Supplementary Information

### Supramolecular Gel Assisted Synthesis of Co<sub>2</sub>P Nanosheets as Efficient and Stable Catalyst for Oxygen Reduction Reaction

Zexing Wu<sup>a, 1,\*</sup>, Min Song<sup>a,1</sup>, Jie Wang<sup>b,\*</sup> and Xien Liu<sup>a,\*</sup>

<sup>a</sup> Key Laboratory of Sensor Analysis of Tumor Marker of Education Ministry; State Key Laboratory Base of Eco-chemical Engineering, College of Chemistry and Molecular Engineering, Qingdao University of Science & Technology, 53 Zhengzhou Road, 266042, Qingdao P. R. China. E-mail: [splswzx@qust.edu.cn](mailto:splswzx@qust.edu.cn); [liuxien@qust.edu.cn](mailto:liuxien@qust.edu.cn)

<sup>b</sup> Department of Applied Physics, The Hong Kong Polytechnic University, Hung Horn, Kowloon, Hong Kong. E-mail: [jw65111@gmail.com](mailto:jw65111@gmail.com)

\* Corresponding author.

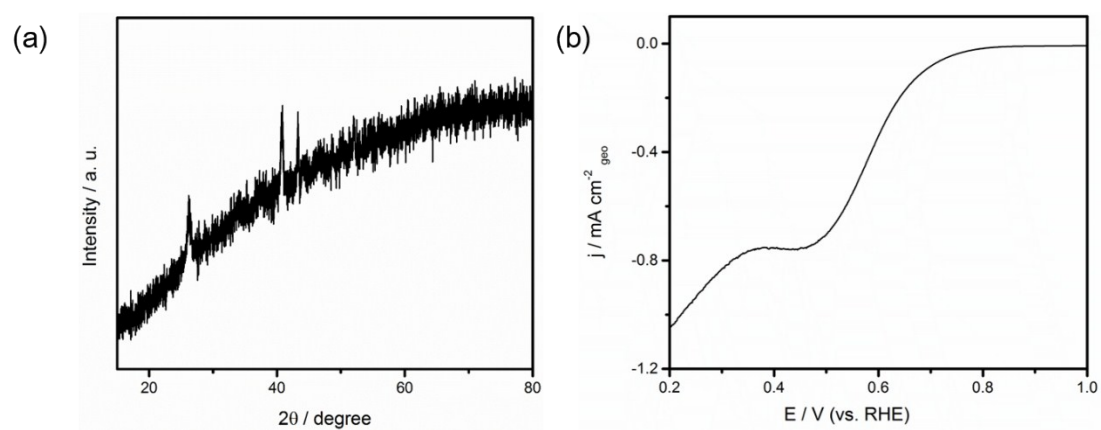

**Figure S1** (a) XRD pattern of  $\text{Co}_2\text{P}$  without carbon matrix. (b) LSV curve of  $\text{Co}_2\text{P}$ .

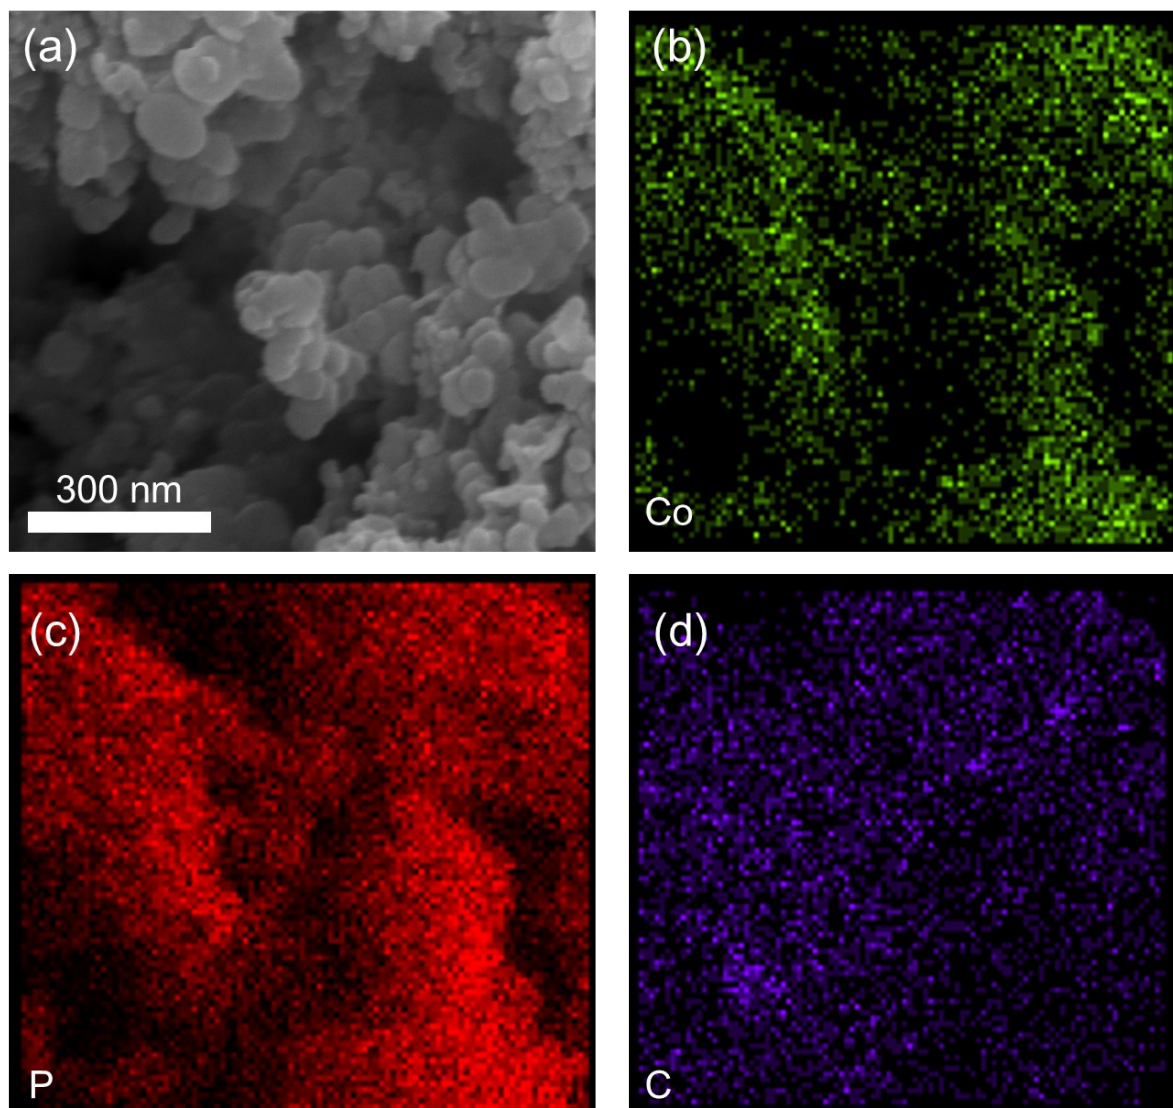

**Figure S2** SEM image of  $\text{Co}_2\text{P}/\text{C}$  (a) and corresponding Co (b), P (c) and C (d) elemental mappings.

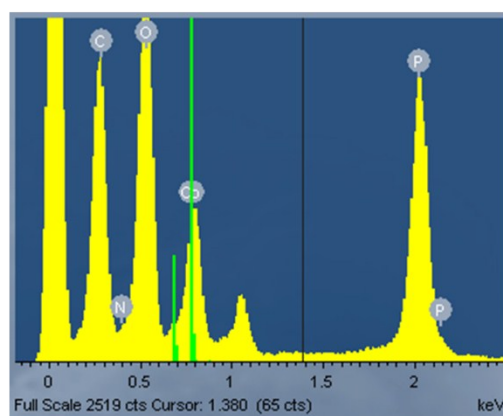

**Figure S3** EDS result of Co<sub>2</sub>P/C.

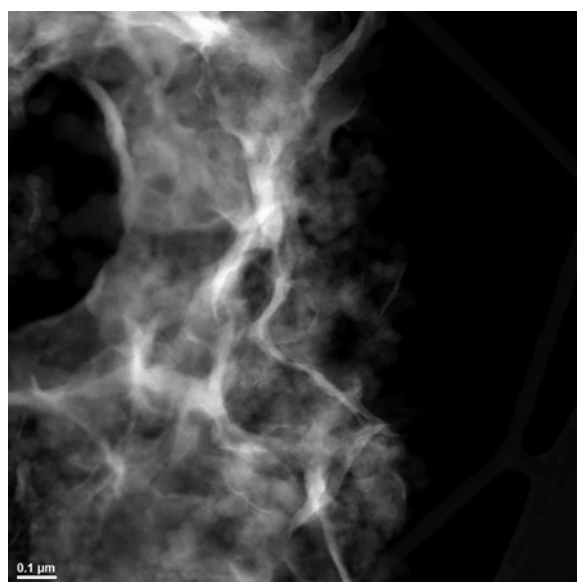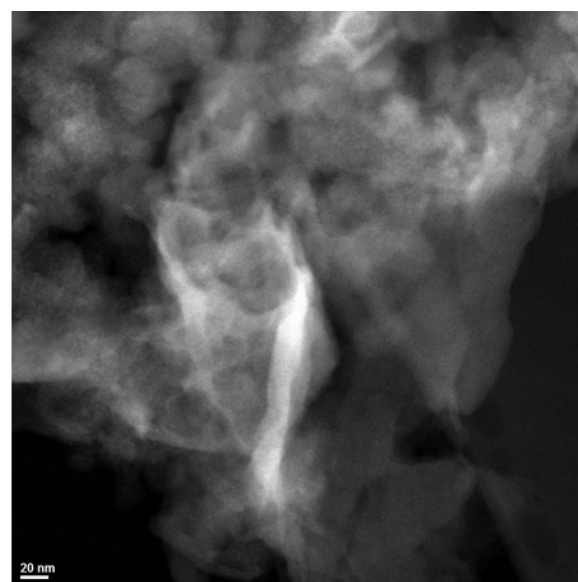

**Figure S4** TEM images of Co<sub>2</sub>P/C after durability test.

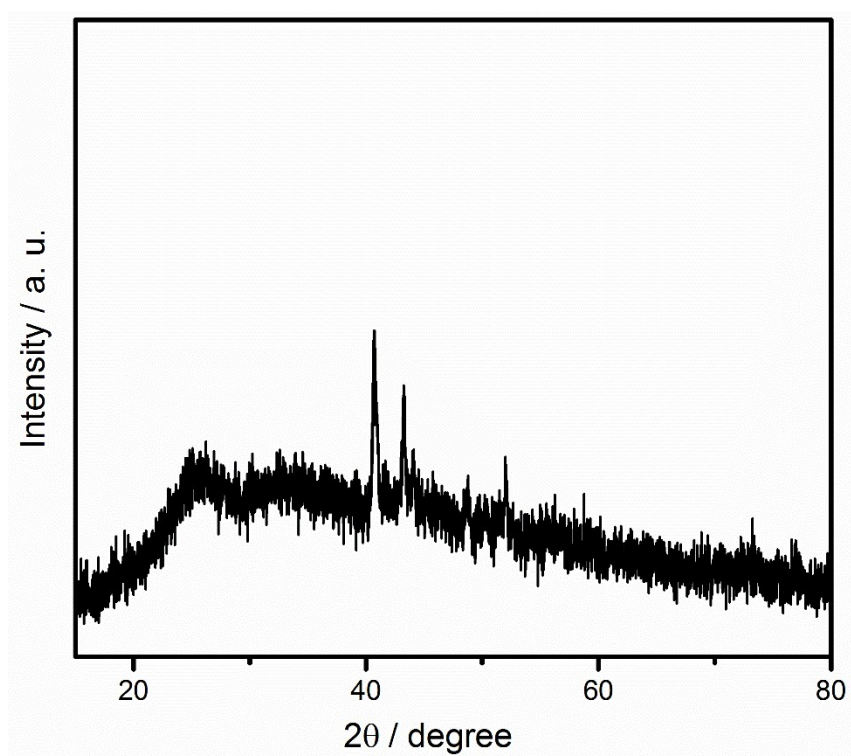

**Figure S5** PXRD of Co<sub>2</sub>P/C after durability test.
